# Supplementary material
Source: MDPI journal article supplement (https://www.mdpi.com/2073-4395/12/10/2373)
Supplement: s1 [file s1]

Table S3. Primer characteristics for identifying blast resistance

| No. | Target gene | Primer Sequence (Forward/Reverse)                   | Chromosome number | Expected size (bp) | Anneling Temperature (°C) | Reference               |
|-----|-------------|-----------------------------------------------------|-------------------|--------------------|---------------------------|-------------------------|
| 1   | Pib         | F: GACTCGGTCGACCAATTCGCC<br>R: ATCAGGCCAGGCCAGATTTG | 2                 | 388                | 54°C                      | (Yan et al., 2017)      |
| 2   | Pi-37       | F: TCTTGAGGGTCCCAGTGTAC<br>R: CGAACAGTGGCTGGTATCTC  | 1                 | 1149               | 58°C                      | (Yan et al., 2017)      |
| 3   | Pi-d2       | F: TTGGCTATCATAGGCGTCC<br>R: ATTTGAAGGCGTTTGCGTAGA  | 6                 | 1058               | 57°C                      | (Yan et al., 2017)      |
| 4   | Pi-ta2      | F: AGCAGGTTATAAGCTAGGCC<br>R: CTACCAACAAGTTCATCAAA  | 12                | 1042               | 59°C                      | (Yan et al., 2017)      |
| 5   | Pik         | F: CGTGCTGTCGCCTGAATCTG<br>R: CACGAACAAGAGTGTGTCGG  | 11                | 226                | 55 °C                     | (Hayashi, et al., 2006) |
| 6   | Pik-m       | F:GCAGATGCATCAGCCAGTGAGTT<br>R:GTGCAGGACCGGCACGCAG  | 11                | 171                | 55 °C                     | (Hayashi et al., 2006)  |
