# Supplementary material
Source: MDPI journal article supplement (https://www.mdpi.com/2073-4395/12/10/2373)
Supplement: s1 [file s1]

Table S4. Analysis of gene homology of the eight rice lines detected by the Pi-ta2 gene using BLASTX

| Genotype | Homology                                                                  | E-value | Identify | Accession number |
|----------|---------------------------------------------------------------------------|---------|----------|------------------|
| G7       | NBS-LRR, partial [Oryza sativa Indica Group]                              | 2E-123  | 96.91%   | CCF78549.1       |
|          | NBS-LRR resistance protein, partial [Oryza sativa Indica Group]           | 2E-119  | 96.88%   | AFH54050.1       |
| G8       | NBS-LRR resistance protein, partial [Oryza sativa]                        | 3E-119  | 99.90%   | AFH58009.1       |
|          | NBS-LRR resistance protein, partial [Oryza sativa]                        | 4E-119  | 99.88%   | AFH54039.1       |
| G9       | NBS-LRR resistance protein, partial [Oryza sativa Japonica Group]         | 4E-119  | 96.88%   | AFF54048.1       |
|          | NBS-LRR resistance protein, partial [Oryza sativa Indica Group]           | 4E-119  | 96.88%   | AFF54047.1       |
| G11      | NB-ARC domain containing protein, expressed [Oryza sativa Japonica Group] | 6E-119  | 96.88%   | ABA97435.1       |
|          | blast resistance protein Pi-ta variant 10 [Oryza sativa Japonica Group]   | 6E-119  | 96.88%   | ACI49447.1       |
| G13      | blast resistance protein Pi-ta variant 5 [Oryza sativa Japonica Group]    | 7E-119  | 96.88%   | ACI49442.1       |
| G14      | Pi-ta protein [Oryza sativa Japonica Group]                               | 8E-119  | 96.88%   | AAK00132.1       |
|          | NBS-LRR, partial [Oryza sativa Indica Group]                              | 1E-118  | 96.35%   | CCD33216.1       |
| G15      | Pi-ta variant KPt.1 [Oryza sativa tropical japonica subgroup]             | 3E-118  | 96.88%   | ACV87221.1       |
|          | blast resistance protein Pi-ta variant 12 [Oryza barthii]                 | 1E-116  | 95.31%   | ACI49449.1       |
| G18      | blast resistance protein Pi-ta variant 14 [Oryza nivara]                  | 2E-114  | 93.23%   | ACI49451.1       |
|          | NBS-LRR, partial [Oryza sativa Indica Group]                              | 7E-92   | 81.25%   | CCD21829.1       |
