# Supplementary material
Source: MDPI journal article supplement (https://www.mdpi.com/2073-4395/12/10/2373)
Supplement: s1 [file s1]

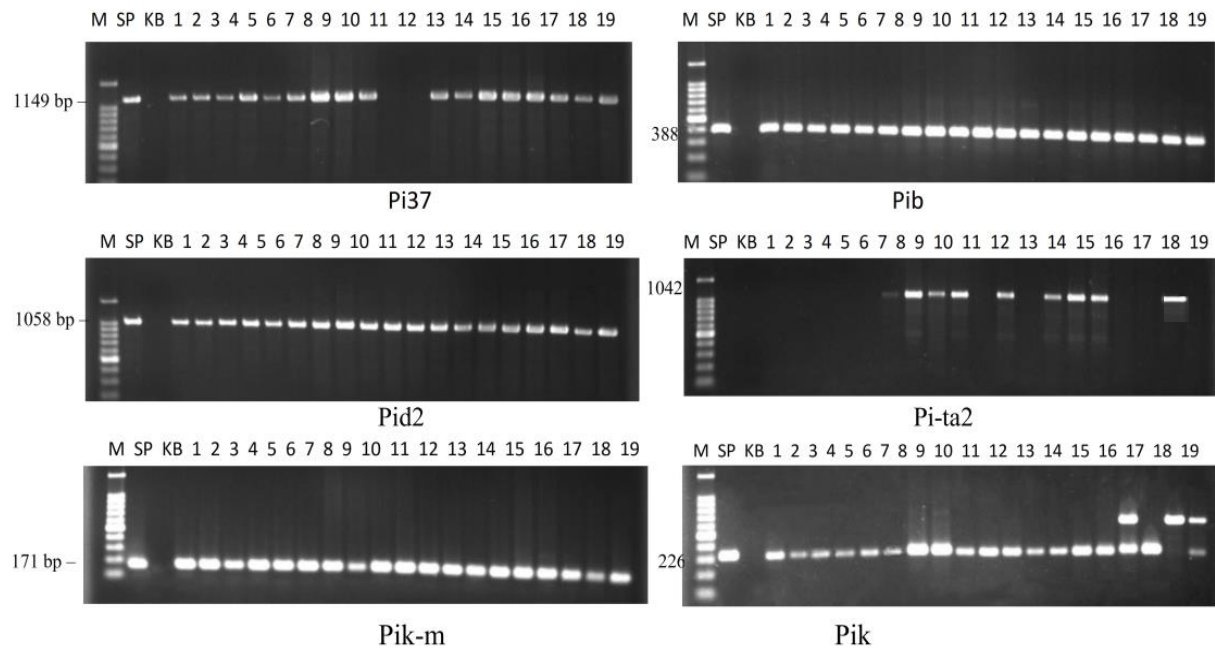

Figure S1. PCR assay showed blast resistance gene expression in 19 upland rice lines using specific primers Pi37, Pib, Pi-d2, Pi-ta2, Pik-m, and Pik (M = 100 bp marker, SP = Situ Patenggang, KB = Kencana Bali; 1– 19 = line numbers)
