# Supplementary material
Source: MDPI journal article supplement (https://www.mdpi.com/2073-4395/12/10/2373)
Supplement: s1 [file s1]

Table S2. The scale of blast disease symptoms for field assessment based on SES IRRI

| Scale | Symptoms                                                                                                          |
|-------|-------------------------------------------------------------------------------------------------------------------|
| 0     | No lesions observed                                                                                               |
| 1     | Tiny brown specks of pin-point size or larger brown specks without sporulating center                             |
| 2     | Small roundish to slightly elongated, necrotic gray spots, about 1-2 mm in diameter, with a distinct brown margin |
| 3     | Lesion type is the same as in scale 2, but a significant number of lesions are on the upper leaves                |
| 4     | Typical susceptible blast lesions 3 mm or longer, infecting less than 4% of the leaf area                         |
| 5     | Typical blast lesions infecting 4-10% of the leaf area                                                            |
| 6     | Typical blast lesions infection 11-25% of the leaf area                                                           |
| 7     | Typical blast lesions infection 26-50% of the leaf area                                                           |
| 8     | Typical blast lesions infection 51-75% of the leaf area and many leaves are dead                                  |
| 9     | More than 75% leaf area affected                                                                                  |
