# Supplementary material
Source: MDPI journal article supplement (https://www.mdpi.com/2073-4395/12/10/2373)
Supplement: s1 [file s1]

Table S1. Selected lines resulting from crossbred for identification of blast resistance

| Genotype | Accession number  | Germplasm          | Genotype | Accession number | Germplasm          |
|----------|-------------------|--------------------|----------|------------------|--------------------|
| G1       | BKL1-RS1-1-247-13 | Bugis/IR7858-1     | G12      | BKL2 B-1-262-4   | Bugis/IR148        |
| G2       | BKL1-RS1-1-248-14 | Bugis/IR7858-1     | G13      | BKL2 B-2-263-5   | Bugis/IR148        |
| G3       | BKL1-RS1-2-249-15 | Bugis/IR7858-1     | G14      | BKL2 B-2-264-6   | Bugis/IR148        |
| G4       | BKL2-RS1-1-251-17 | Bugis/IR148        | G15      | BKL3 B-2-266-8   | Sriwijaya/IR148    |
| G5       | BKL3-RS1-1-253-18 | Sriwijaya/IR148    | G16      | BKL3 B-3-267-9   | Sriwijaya/IR148    |
| G6       | BKL4-RS1-1-256-21 | Sriwijaya/IR7858-1 | G17      | BKL4 B-1-268-10  | Sriwijaya/IR7858-1 |
| G7       | BKL4-RS1-2-257-22 | Sriwijaya/IR7858-1 | G18      | BKL4 B2-269-11   | Sriwijaya/IR7858-1 |
| G8       | BKL4-RS1-3-258-23 | Sriwijaya/IR7858-1 | G19      | BKL4 B-3-270-12  | Sriwijaya/IR7858-1 |
| G9       | BKL1 B-1-259-1    | Bugis/IR7858-1     | G20      | Kencana Bali     | Susceptible check  |
| G10      | BKL1 B-2-260-2    | Bugis/IR7858-1     | G21      | Situ Patenggang  | Resistance check   |
| G11      | BKL1 B-3-261-3    | Bugis/IR7858-1     |          |                  |                    |
